# Supplementary material for: STAT1 signaling shields T cells from NK cell-mediated cytotoxicity
Source: Nat Commun. 2019 Feb 22;10:912. doi: 10.1038/s41467-019-08743-8 (PMC6385318; doi:10.1038/s41467-019-08743-8)
Supplement: Supplementary file 1 — Supplementary Information [file 41467_2019_8743_MOESM1_ESM.pdf]

## **STAT1 signaling shields T cells from NK cell mediated cytotoxicity**

Kang et. al.

## Supplementary Figures

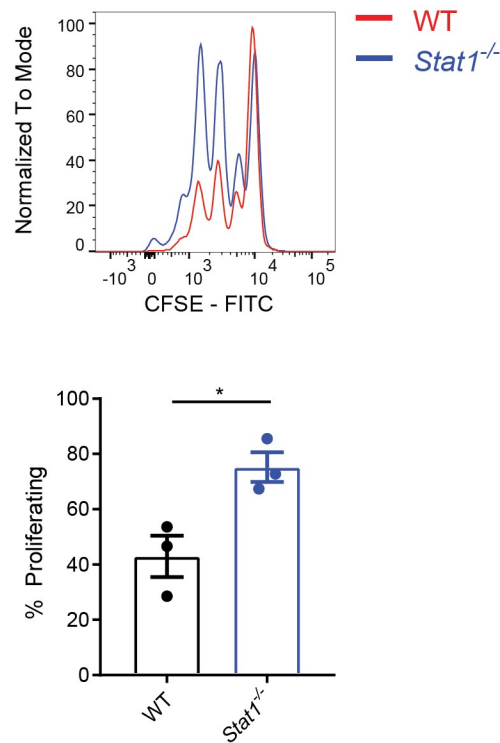

**Supplementary Fig. 1** *Stat1*<sup>-/-</sup> T cells do not display defective expansion *in vitro*. WT or *Stat1*<sup>-/-</sup> unfractionated CD4<sup>+</sup> T cells were stimulated *in vitro* with anti-CD3 (3μg/ml) and anti-CD28 (1μg/ml) for 3 days and cell proliferation analyzed. Representative flow cytometry plots are shown (gated on live CD4<sup>+</sup> cells) with mean frequencies ± SEM. Data are pooled from 3 independent experiments, with each point representing the average across technical replicates in each experiment. \*p<0.05 by unpaired two-tailed t-test. Refers to Fig. 4.

**a**

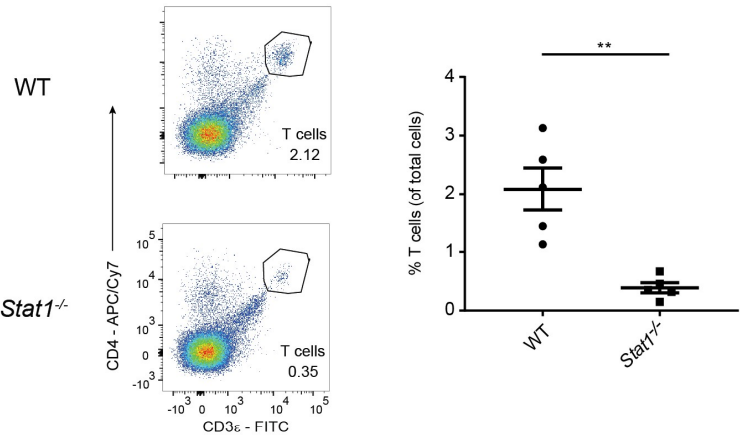

**b**

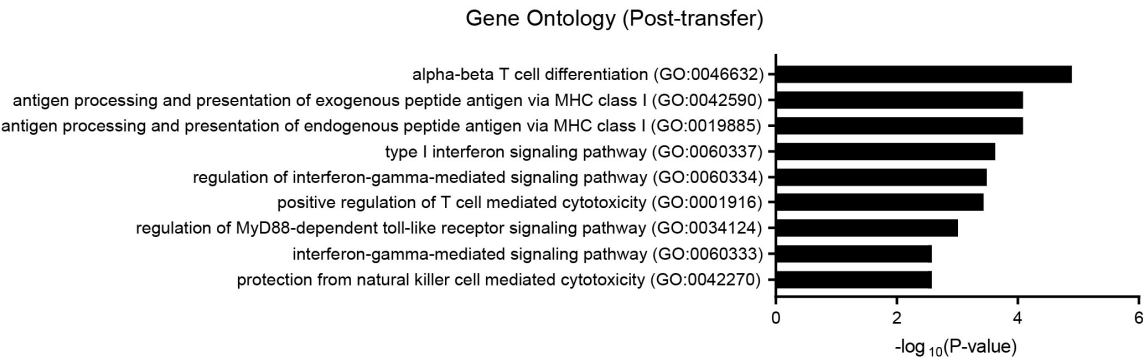

**c**

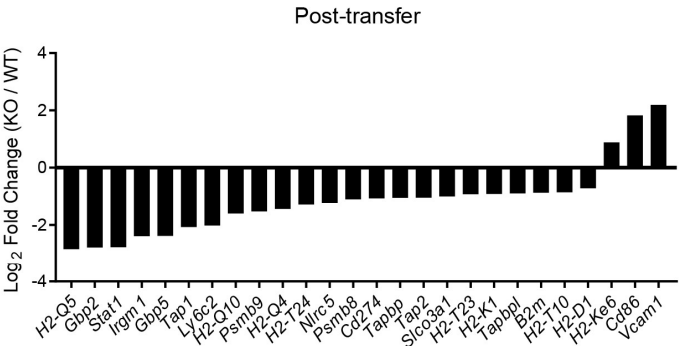

**d**

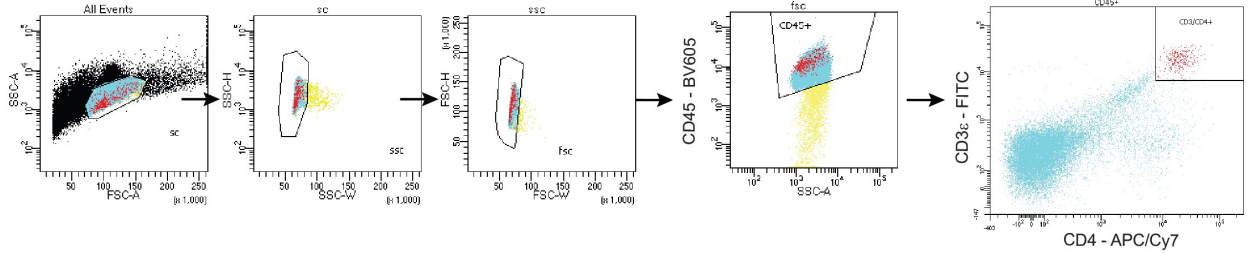

**Supplementary Fig. 2 Downregulation of the MHC-I pathway in *Stat1*<sup>-/-</sup> T cells post-transfer.**

*Rag1*<sup>-/-</sup> mice were injected i.p. with 5 X 10<sup>6</sup> WT or *Stat1*<sup>-/-</sup> unfractionated CD4<sup>+</sup> T cells and analyzed 1 week post transfer. **(a)** Representative flow cytometry plots of CD4<sup>+</sup> T cells (spleen + lymph nodes) post-transfer, along with their mean frequencies ± SEM. Each point represents an individual mouse. **(b)** Selected Gene ontology terms showing differential expression of the MHC class I pathway in *Stat1*<sup>-/-</sup> T cells post-transfer. **(c)** Similar downregulation of various genes involved in MHC class I antigen presentation in *Stat1*<sup>-/-</sup> T cells compared to WT T cells in the post-transfer setting. **(d)** Gating strategy for sorting T cells for RNA-seq post transfer. \*\*p<0.01 by two-tailed Mann-Whitney test. Refers to Fig. 5.

**a**

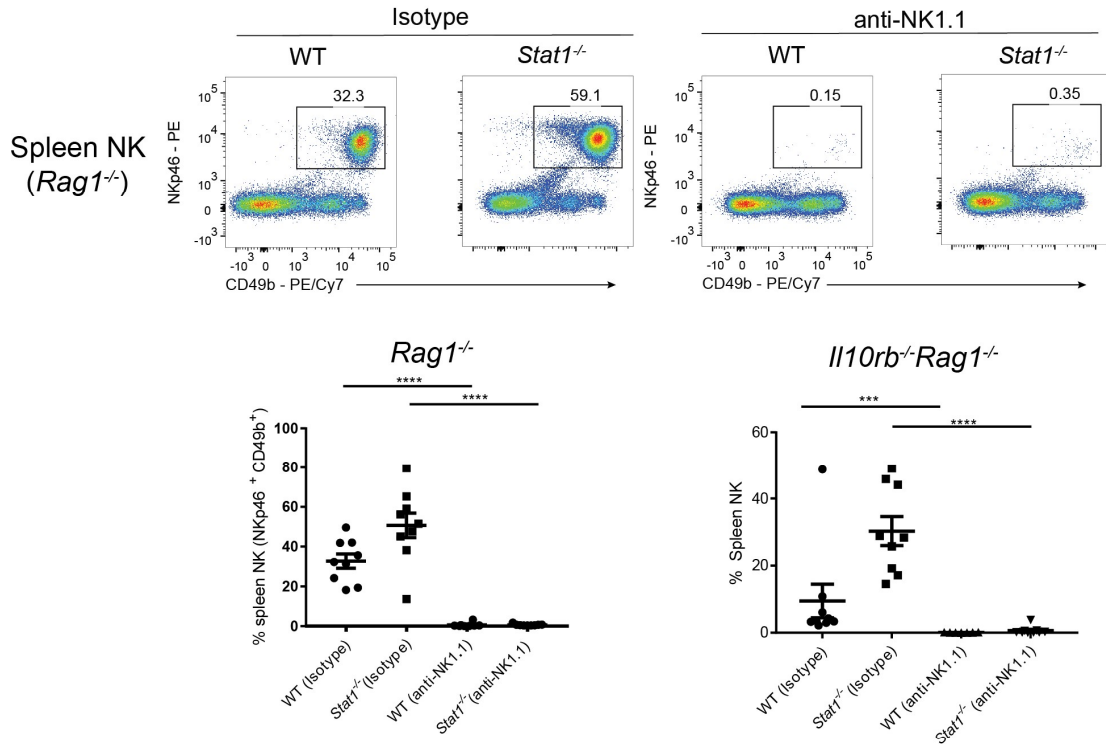

**b**

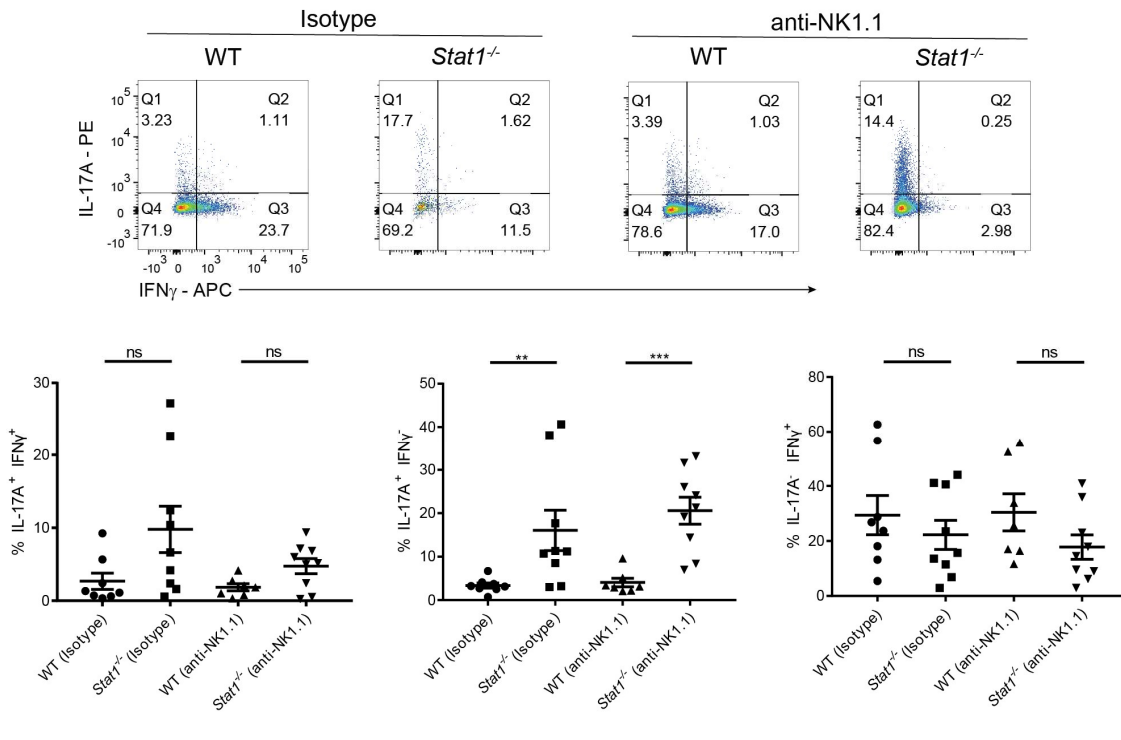

**Supplementary Fig. 3 NK cell depletion does not alter *Stat1*<sup>-/-</sup> T cell differentiation *in vivo*.**

**(a)** anti-NK1.1 depleting antibody effectively removes NK cells. Representative flow cytometry plots of splenic NK cells (NKp46<sup>+</sup> CD49b<sup>+</sup>) in *Rag1*<sup>-/-</sup> mice injected with control or NK cell depleting antibody at 3 weeks post transfer, as well as their mean frequencies  $\pm$  SEM in both *Rag1*<sup>-/-</sup> and *Il10rb*<sup>-/-</sup>*Rag1*<sup>-/-</sup> mice. **(b)** Colonic T cells (gated on live CD45<sup>+</sup> TCR $\beta$ <sup>+</sup> CD4<sup>+</sup> T cells) from *Il10rb*<sup>-/-</sup>*Rag1*<sup>-/-</sup> mice at 3 weeks post transfer were analyzed for their differentiation profile by IL-17A and IFN $\gamma$  staining. Representative plots are shown along with their mean frequencies  $\pm$  SEM. Data pooled from 3 independent experiments, with each point representing an individual mouse. \*\*p<0.01, \*\*\*p<0.001, \*\*\*\*p<0.0001 by two-tailed Mann-Whitney test. Refers to Fig. 6.

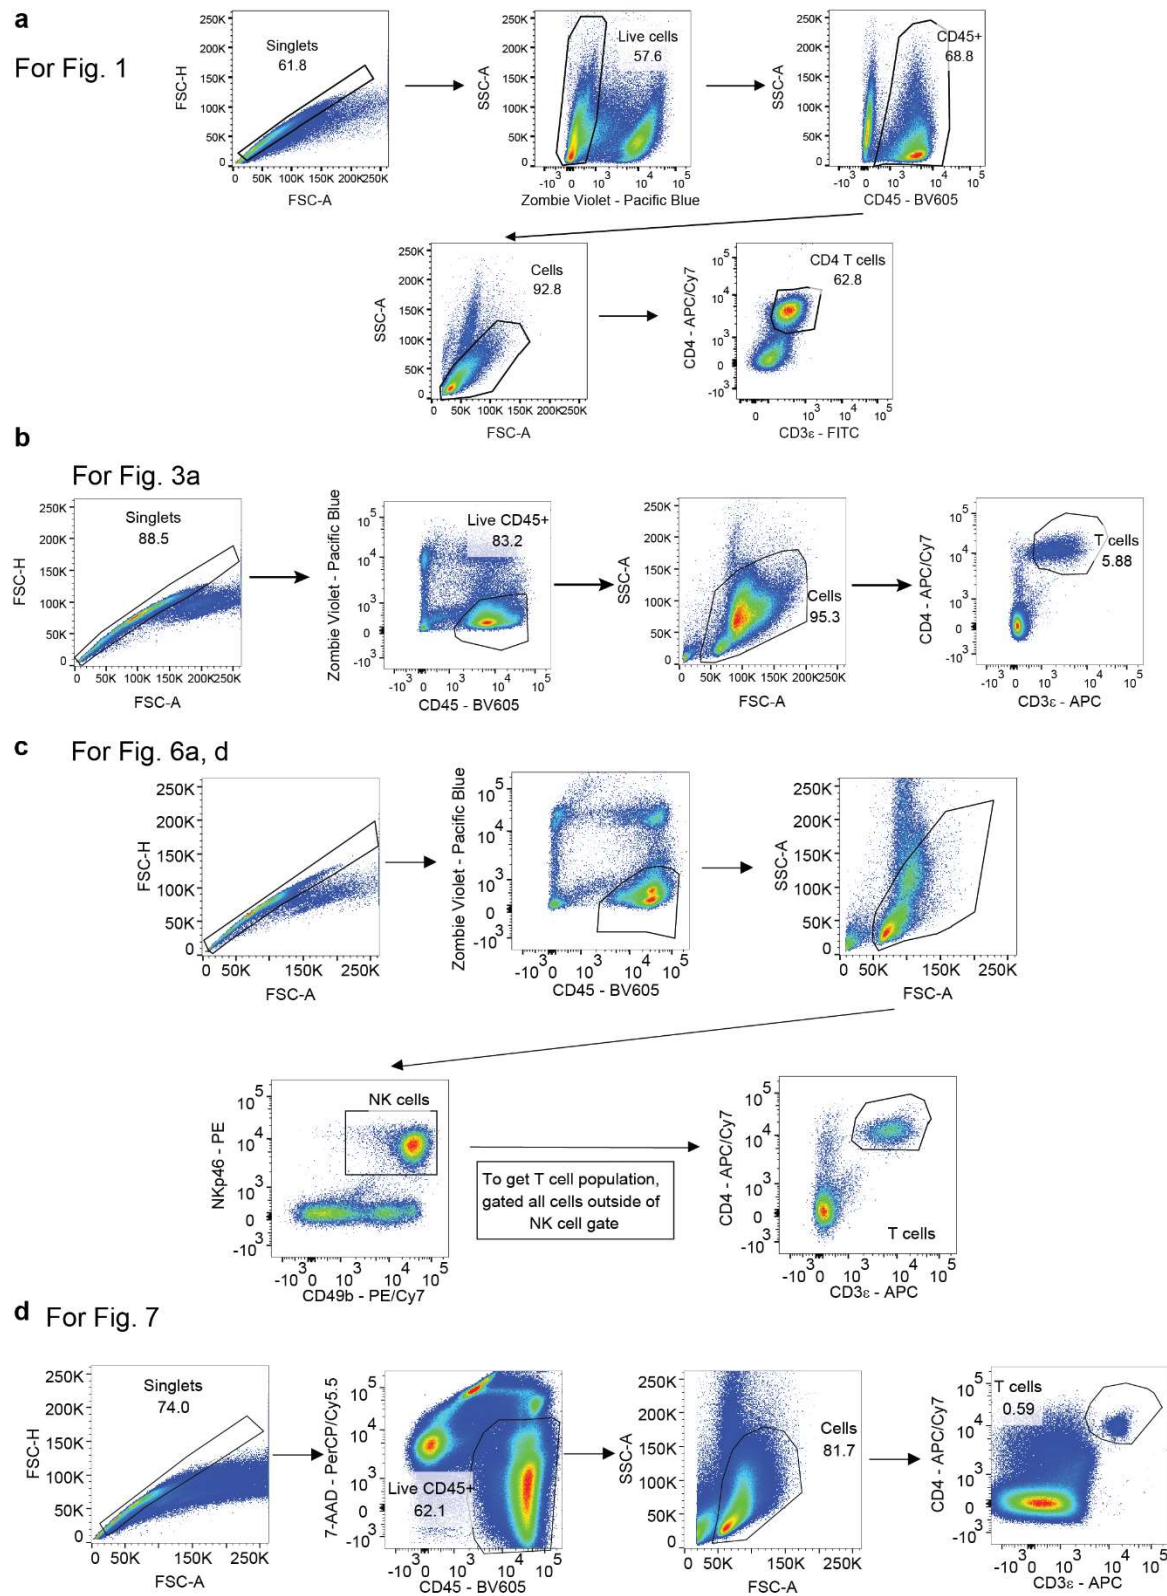

**Supplementary Fig. 4 Gating Strategies.** Representative gating strategies used for the flow cytometric analyses in (a) Fig. 1, (b) Fig. 3a, (c) Fig. 6a,d and (d) Fig. 7.
